# Supplementary material for: Favorable Heteroaromatic Thiazole-Based Polyurea Derivatives as Interesting Biologically Active Products
Source: MDPI journal article supplement (doi:10.3390/polym15122662), 2023-06-13
Supplement: s1 [file s1]

**Table S1.** Validation of docking method with gentamycin and co-crystalline compound with “1JJ” protein for *Staphylococcus aureus* as positive-Gram bacteria.

| Validation compound     | Docking Score | rmsd_refine | E_conf | E_place | E_score1 | E_refine | E_score2 |
|-------------------------|---------------|-------------|--------|---------|----------|----------|----------|
| Co-Crystalline ligand * | -6.72         | 1.89        | 63.05  | -51.27  | -10.74   | -36.22   | -6.72    |
|                         | -6.56         | 1.13        | 68.88  | -64.48  | -12.99   | -35.57   | -6.56    |
|                         | -6.45         | 3.65        | 68.67  | -58.49  | -10.66   | -37.31   | -6.45    |
|                         | -6.40         | 2.18        | 73.84  | -73.95  | -11.39   | -36.90   | -6.40    |
|                         | -6.31         | 1.79        | 62.77  | -56.91  | -9.62    | -37.48   | -6.31    |

\*3-((3-methyl-2-(1-methyl-1H-imidazole-2-carbonyl)benzofuran-4-yl)oxy)-N-(pyridin-3-ylmethyl)propan-1-aminium.

**Table S2.** Docking score of polyurea derivatives PU<sub>1</sub>-PU<sub>5</sub> with “1JJ” protein for *Staphylococcus aureus* as positive-Gram bacteria.

|            | S     | rmsd_refine | E_conf  | E_place | E_score1 | E_refine | E_score2 |
|------------|-------|-------------|---------|---------|----------|----------|----------|
| PU1        | 8.07  | 2.01        | -191.34 | -76.96  | -12.46   | -59.11   | -8.07    |
|            | -8.01 | 1.94        | -187.96 | -103.66 | -12.69   | -54.59   | -8.01    |
|            | -7.57 | 2.41        | -182.02 | -105.11 | -13.57   | -50.18   | -7.57    |
|            | -7.53 | 1.82        | -186.62 | -114.40 | -12.02   | -53.32   | -7.53    |
|            | -7.49 | 1.51        | -183.65 | -120.05 | -15.69   | -56.73   | -7.49    |
| PU2        | -8.06 | 1.92        | -182.67 | -79.14  | -11.09   | -55.47   | -8.57    |
|            | -8.04 | 2.26        | -182.24 | -99.70  | -13.43   | -52.54   | -8.04    |
|            | -8.02 | 2.71        | -163.52 | -80.54  | -14.15   | -44.26   | -8.02    |
|            | -8.02 | 1.55        | -179.31 | -114.96 | -12.46   | -54.62   | -8.02    |
|            | -8.01 | 2.05        | -171.54 | -42.57  | -10.68   | -54.10   | -8.01    |
| PU3        | -9.04 | 1.50        | -197.76 | -104.59 | -12.03   | -55.61   | -9.04    |
|            | -8.86 | 3.10        | -192.23 | -80.95  | -11.40   | -56.05   | -8.86    |
|            | -8.76 | 1.46        | -193.05 | -122.04 | -12.89   | -52.91   | -8.76    |
|            | -8.73 | 1.41        | -197.32 | -107.59 | -11.38   | -56.22   | -8.73    |
|            | -8.71 | 2.13        | -181.81 | -98.73  | -13.36   | -50.32   | -8.71    |
| PU4        | -8.48 | 1.29        | -248.67 | -94.90  | -12.82   | -44.03   | -8.48    |
|            | -8.01 | 1.50        | -249.10 | -90.09  | -13.87   | -52.84   | -8.01    |
|            | -8.01 | 1.52        | -249.11 | -87.38  | -11.40   | -43.34   | -8.01    |
|            | -7.91 | 3.30        | -249.99 | -64.16  | -11.82   | -45.17   | -7.91    |
|            | -7.89 | 1.36        | -252.97 | -81.95  | -11.36   | -52.65   | -7.89    |
| PU5        | -7.83 | 1.38        | -213.00 | -85.17  | -12.54   | -41.73   | -8.83    |
|            | -7.68 | 2.12        | -216.21 | -136.08 | -13.36   | -53.87   | -8.68    |
|            | -7.66 | 2.10        | -208.56 | -58.30  | -11.63   | -48.28   | -8.66    |
|            | -7.64 | 1.50        | -219.33 | -79.82  | -11.43   | -53.54   | -8.64    |
|            | -7.57 | 1.74        | -227.72 | -99.85  | -11.43   | -50.72   | -8.57    |
| Ampicillin | -7.09 | 2.85        | 75.28   | -74.94  | -11.17   | -38.44   | -7.09    |
|            | -7.06 | 1.12        | 83.85   | -72.27  | -11.98   | -30.04   | -7.06    |
|            | -7.04 | 1.40        | 77.94   | -70.05  | -11.89   | -28.08   | -7.04    |
|            | -7.02 | 1.83        | 70.63   | -95.75  | -11.39   | -39.01   | -7.02    |
|            | -6.96 | 2.26        | 81.25   | -74.87  | -12.51   | -29.86   | -6.96    |

**Table S3.** Docking interaction of polyurea derivatives PU<sub>1</sub>-PU<sub>5</sub> with “1JJ” protein for *Staphylococcus aureus* as positive-Gram bacteria.

| Compound   | Ligand | Receptor          | Interaction | Distance | E (kcal/mol) |
|------------|--------|-------------------|-------------|----------|--------------|
| PU1        | O 39   | SG CYS 37 (A)     | H-donor     | 3.53     | -0.9         |
|            | O 44   | OD1 ASP 177 (A)   | H-donor     | 2.89     | -3.3         |
|            | O 39   | N GLY 193 (A)     | H-acceptor  | 3.06     | -2.1         |
| PU2        | S 31   | O PRO 222 (A)     | H-donor     | 3.65     | -1.4         |
|            | 6-ring | CA LYS 231 (A)    | pi-H        | 3.76     | -0.6         |
| PU3        | 6-ring | CA GLY 233 (A)    | pi-H        | 4.43     | -0.5         |
|            | 5-ring | CB LYS 234 (A)    | pi-H        | 3.82     | -1.1         |
| PU4        | S 14   | O PRO 222 (A)     | H-donor     | 3.24     | -0.6         |
|            | N 49   | O PRO 222 (A)     | H-donor     | 3.24     | -1.2         |
| Ampicillin | O 39   | SG CYS 37 (A)     | H-donor     | 3.26     | -1.9         |
|            | C 12   | OD2 ASP 80 (A)    | H-donor     | 3.38     | -0.5         |
|            | O 15   | N ASP 40 (A)      | H-acceptor  | 3.24     | -2.0         |
|            | C 40   | 5-ring HIS 50 (A) | H-pi        | 4.42     | -0.7         |

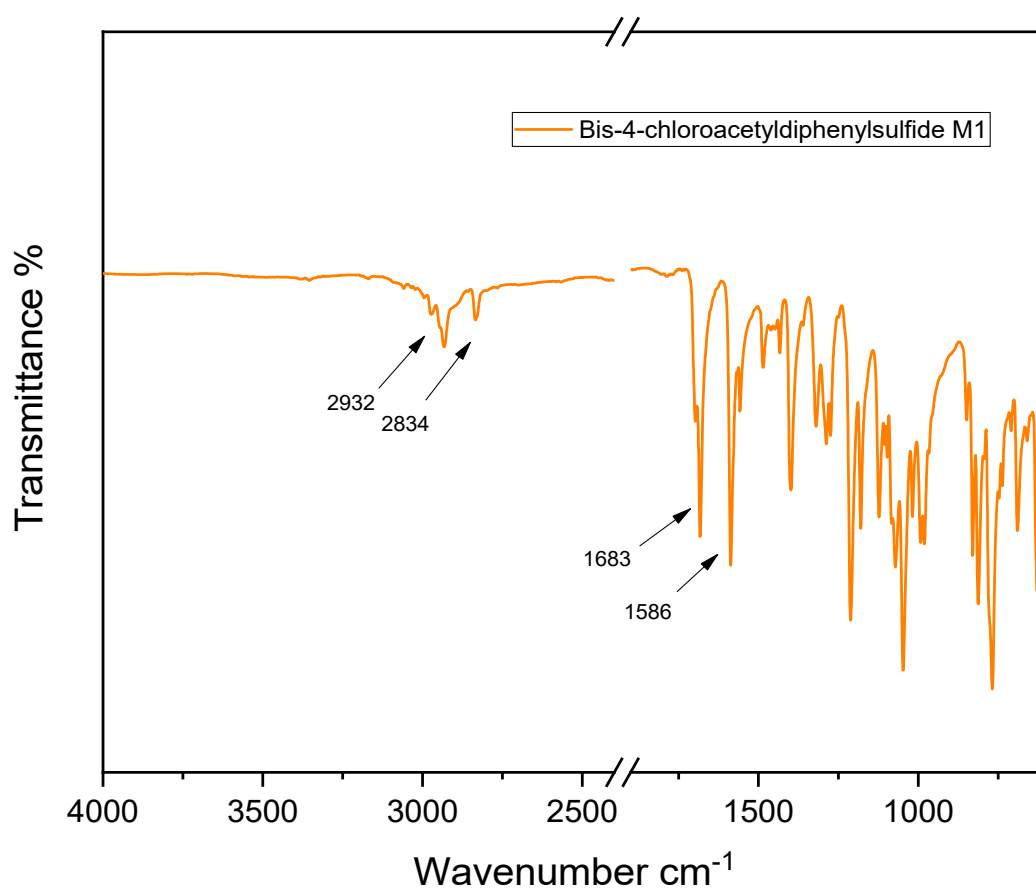

**Figure S1.** I.R spectrum of bis-4-chloroacetyl-diphenylsulfide.

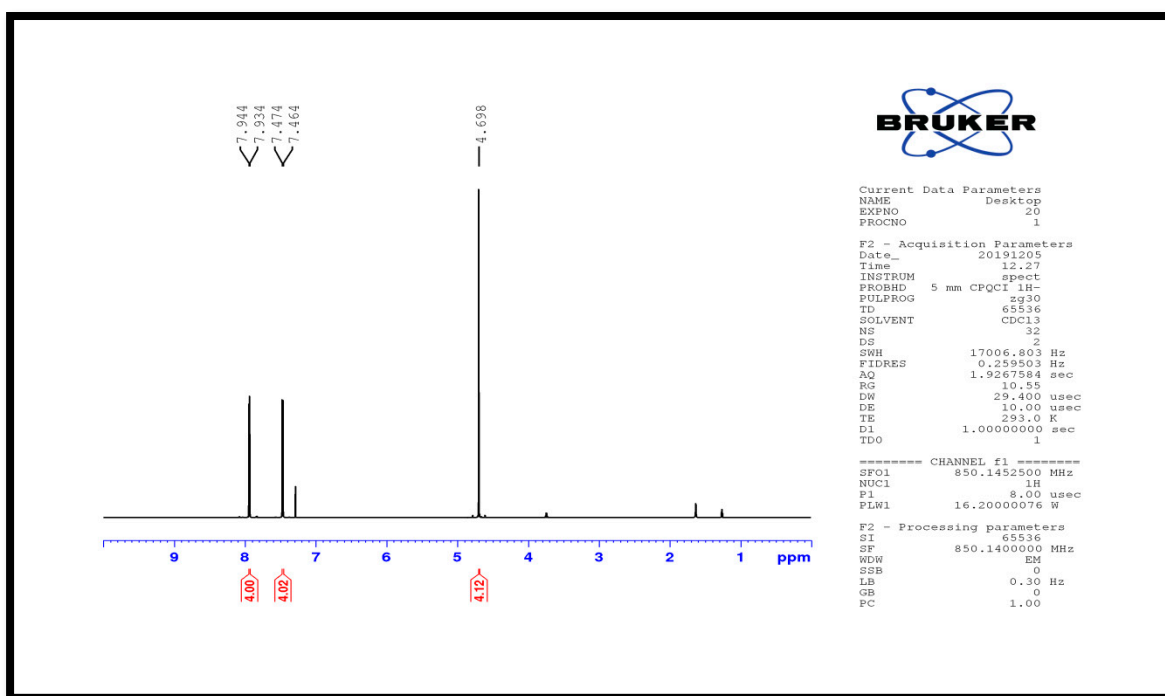

Figure S2. <sup>1</sup>H NMR spectrum of chloroacetyl-diphenylsulfide.

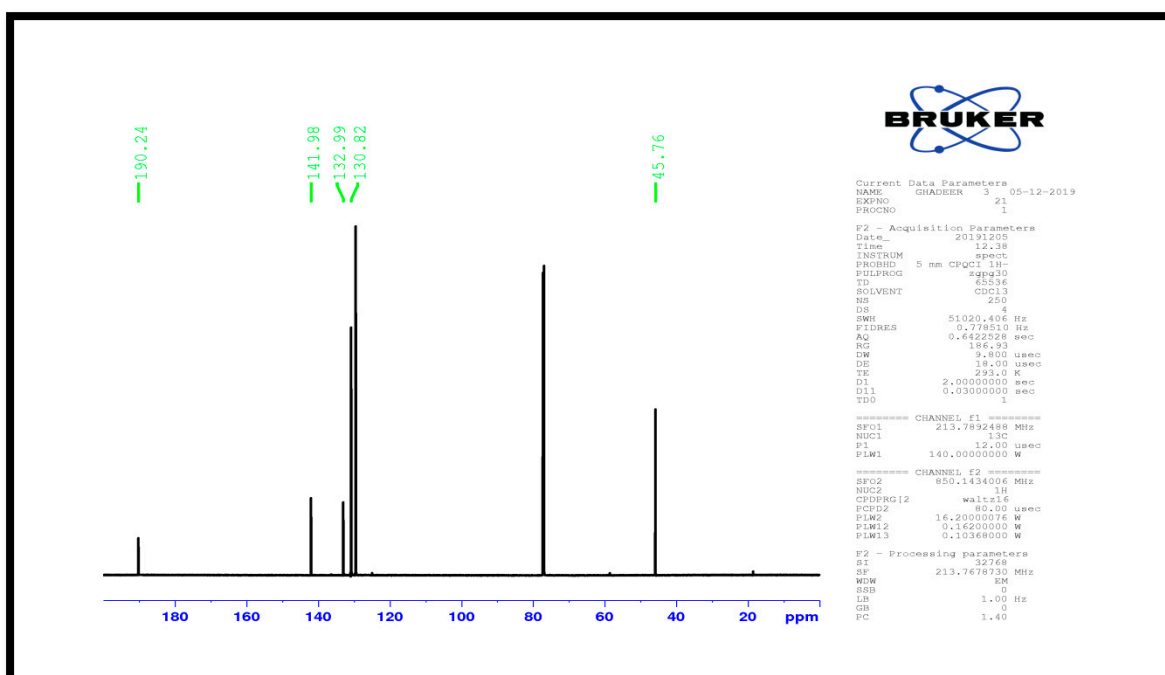

Figure S3. <sup>13</sup>C NMR spectrum of chloroacetyl-diphenylsulfide.

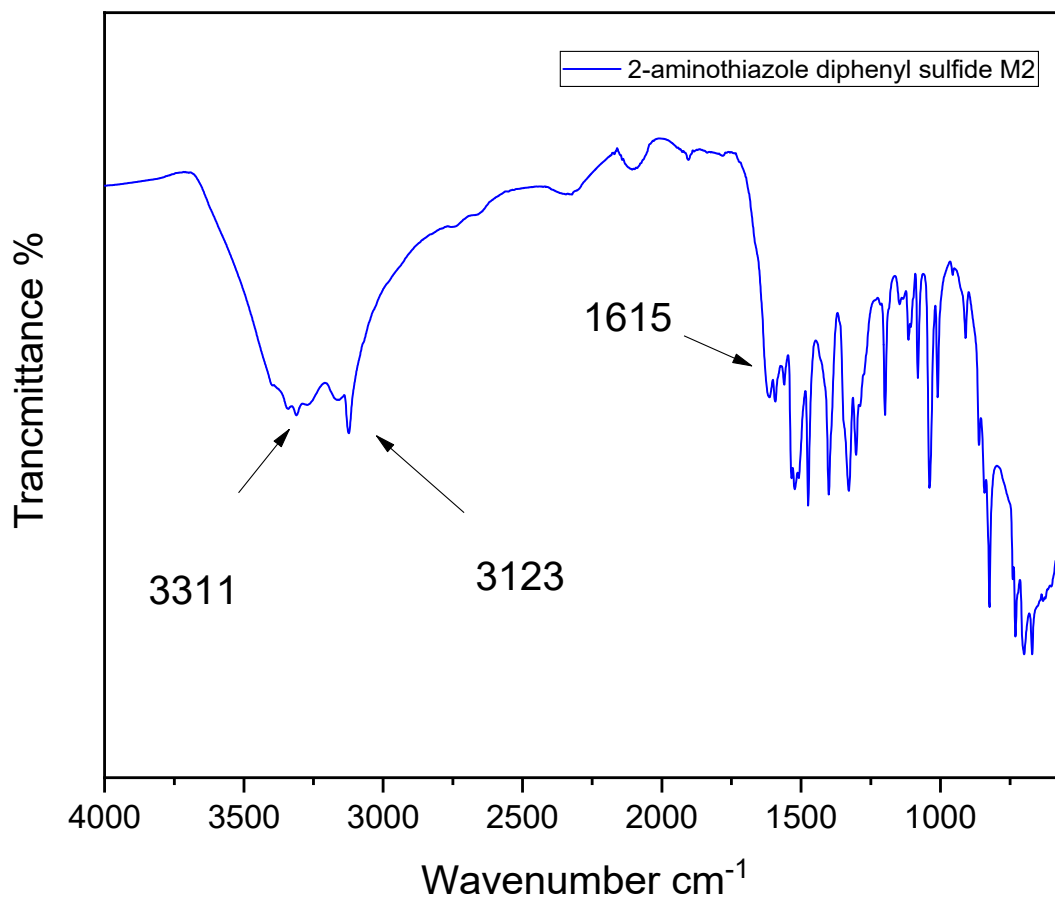

Figure S4. I.R spectrum of 2-aminothiazole diphenylsulfide.

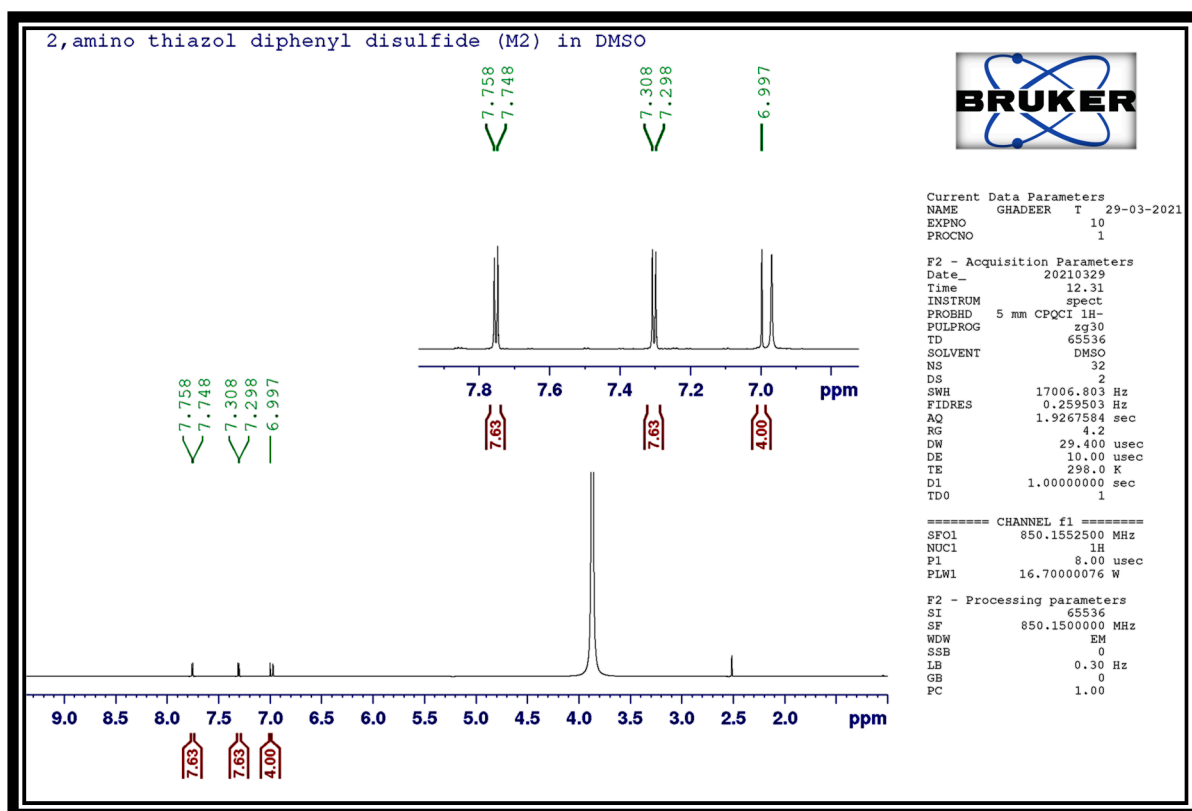

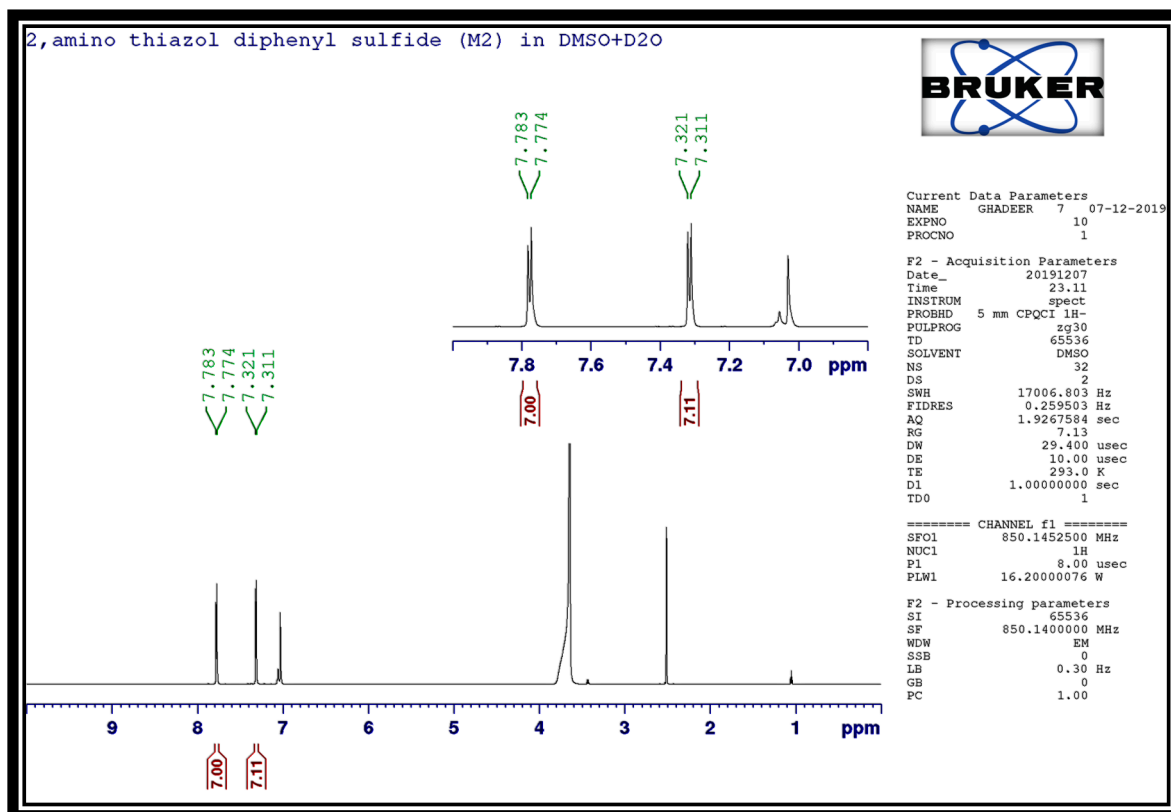

Figure S5.  $^1\text{H}$ NMR spectra of 2-aminothiazol diphenylsulfide+ with  $\text{D}_2\text{O}$ .

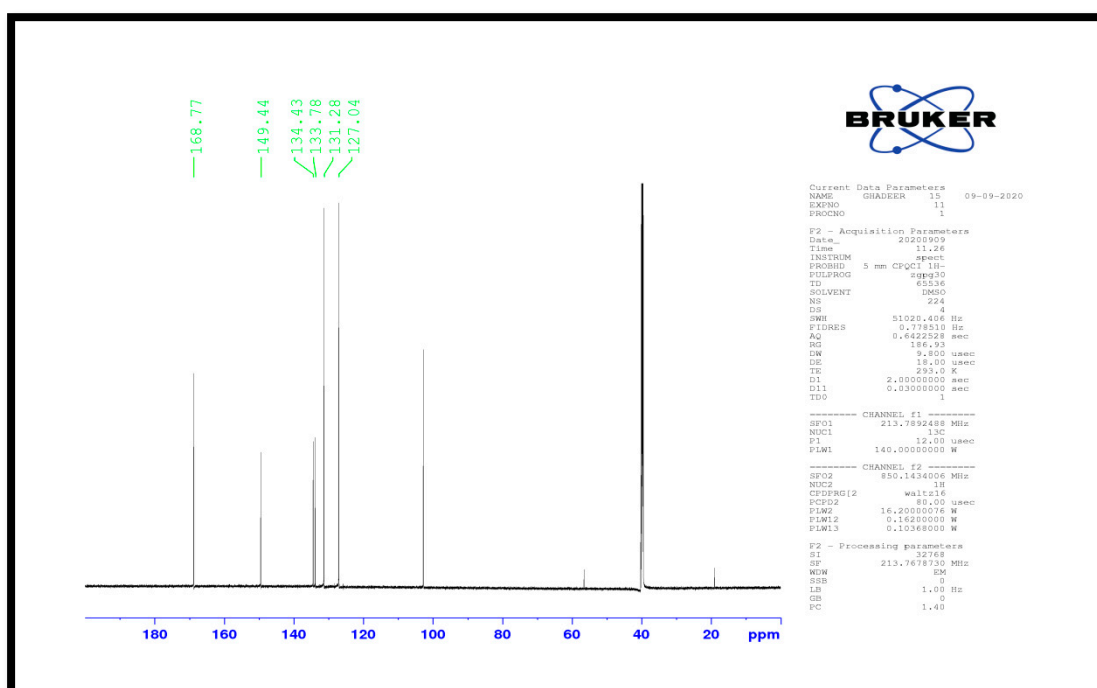

Figure S6.  $^{13}\text{C}$ NMR spectrum of 2-aminothiazol diphenylsulfide.

PU1

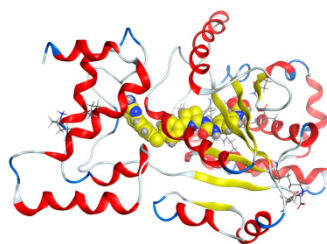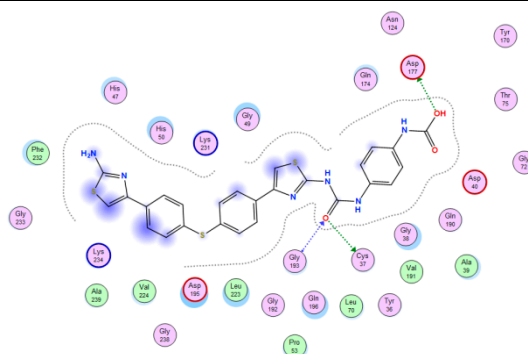

PU2

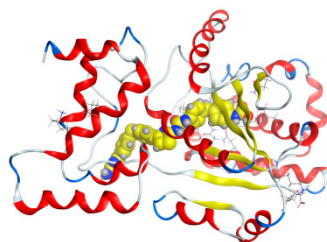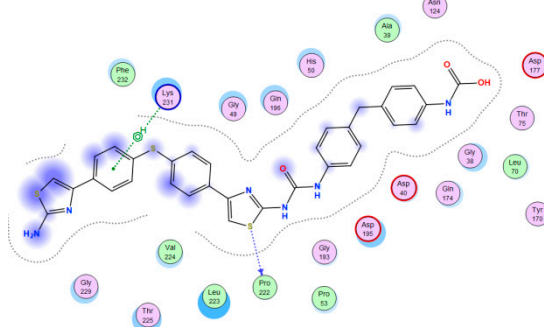

PU3

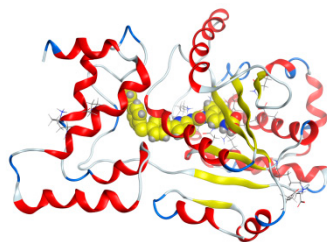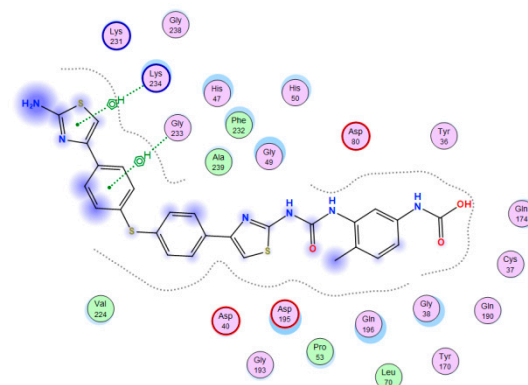

PU4

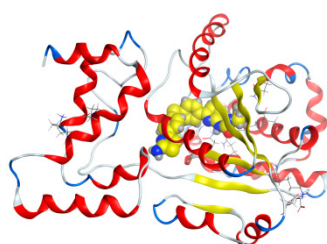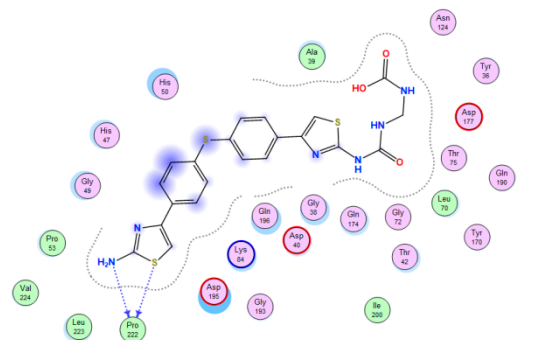

PU5

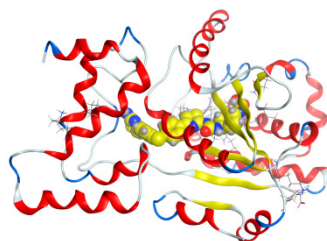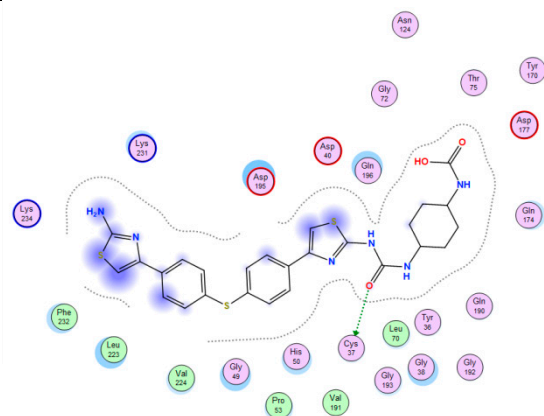

Ampicillin

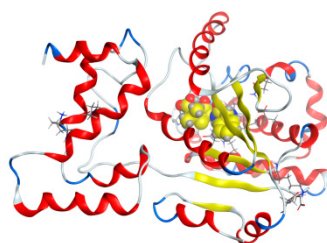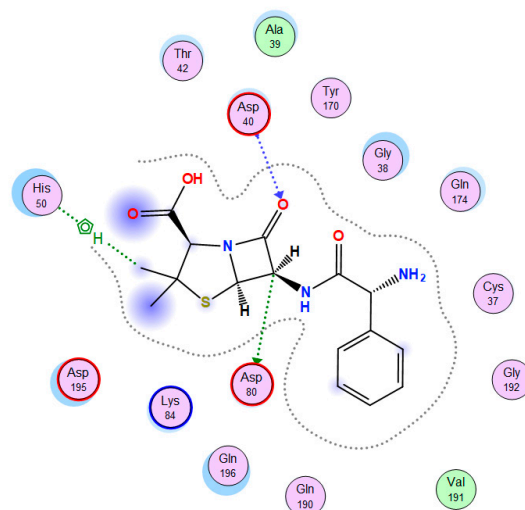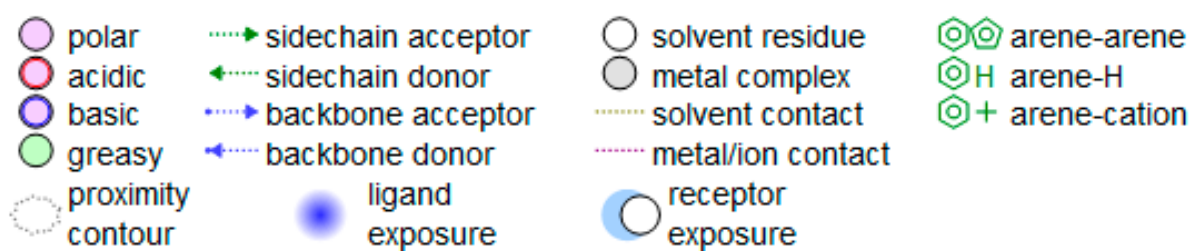

**Figure S7.** 2D and 3D interaction of polyurea derivatives PU<sub>1</sub>–PU<sub>5</sub> with “1JJ” protein fo-r *Staphylococcus aureus* as positive-Gram bacteria.
